# Supplementary material for: Sub-second carbon-nanotube-mediated microwave sintering for high-conductivity silver patterns on plastic substrates
Source: Royal Society of Chemistry journal article supplement (doi:10.1039/c5nr08082g), 2016-01-01
Supplement: c5nr08082g1.pdf [file c5nr08082g1.pdf]

## Electronic Supplementary Information

### **Sub-second carbon-nanotube-mediated microwave sintering for high-conductivity silver patterns on plastic substrates**

*Sunshin Jung,<sup>\*a,b</sup> Su Jin Chun,<sup>a</sup> Joong Tark Han,<sup>a,b</sup> Jong Seok Woo,<sup>a</sup> Chae-Hwa Shon<sup>c</sup> and Geon-Woong Lee<sup>a</sup>*

*<sup>a</sup>Nano Hybrid Technology Research Center, Korea Electrotechnology Research Institute (KERI), Changwon 51543, Republic of Korea. E-mail: [ssjung@keri.re.kr](mailto:ssjung@keri.re.kr)*

*<sup>b</sup>University of Science and Technology (UST), Daejeon 34113, Republic of Korea.*

*<sup>c</sup>Power Apparatus Research Center, Korea Electrotechnology Research Institute (KERI), Changwon 51543, Republic of Korea.*

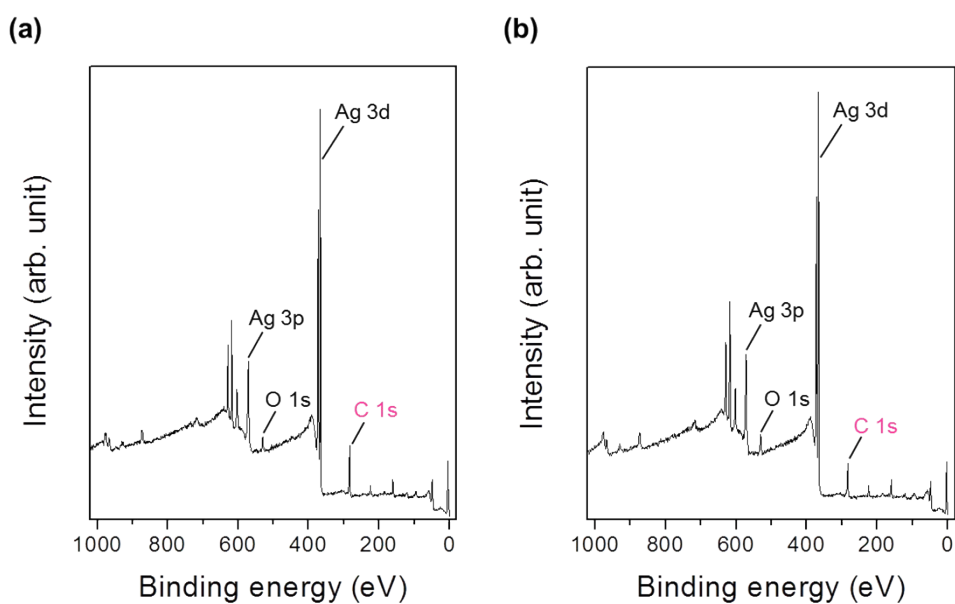

**Fig. S1** XPS data of Ag lines on PI (a) before and (b) after microwave sintering at 350 °C, which show the reduction in atomic carbon content.

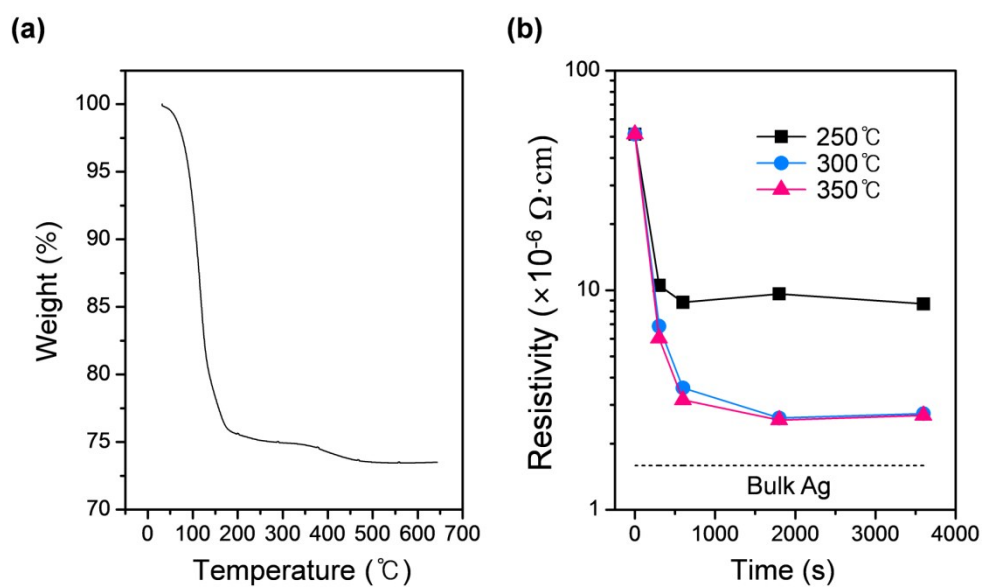

**Fig. S2** (a) TGA data of the Ag ink as a function of temperature. (b) Resistivity of Ag lines as a function of thermal sintering time at temperatures ranging from 250 °C to 350 °C.

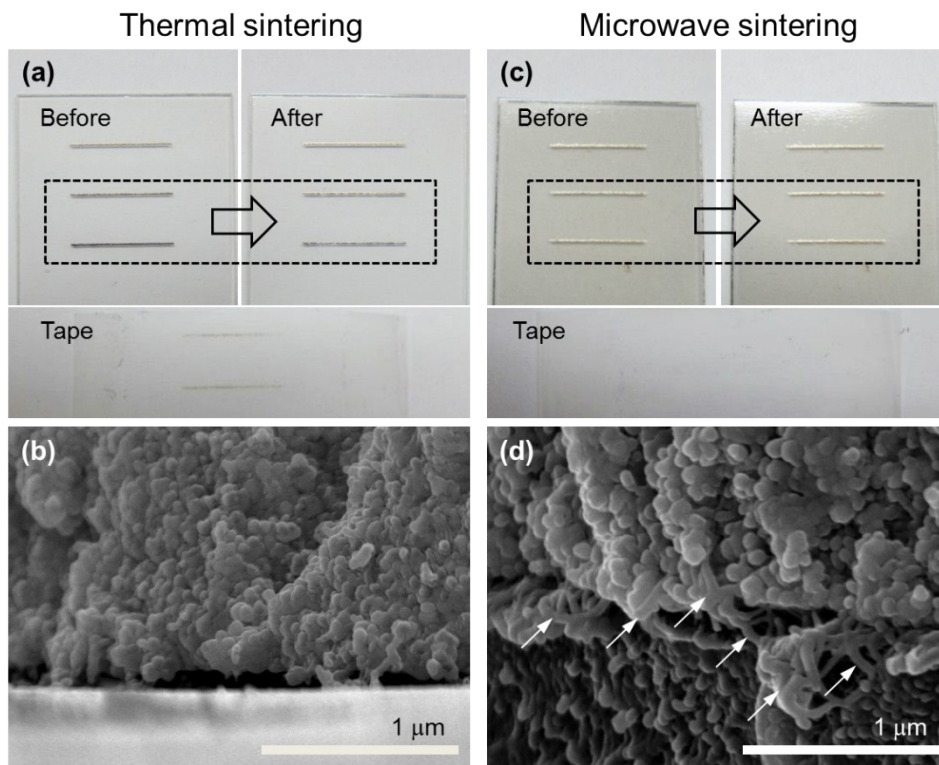

**Fig. S3** Typical tape tests for Ag lines' adhesion to PC substrates after thermal and microwave sintering. (a) Tape test result and (b) cross-sectional FE-SEM image of Ag lines that were thermally sintered at 140 °C for 30 s; the image in (b) reveals spaces between the thermally sintered Ag lines and substrates. (c) Tape test result and (d) cross-sectional FE-SEM image of Ag lines that were microwave-sintered at 300 °C for 0.6 s, showing better adhesion to the PC substrate than the thermally sintered lines in (a) and (b); the image in (b) also shows that the microwave-sintered lines were connected to the substrate via CNTs.

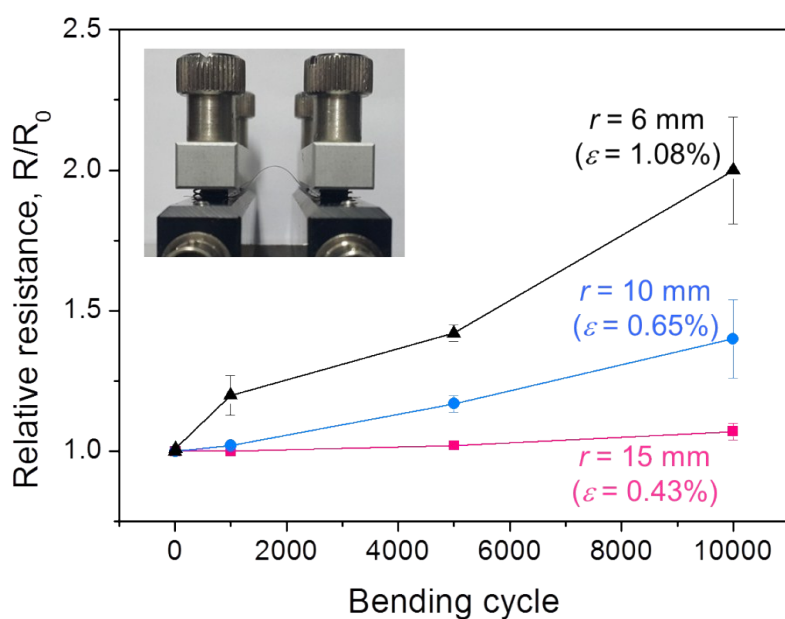

**Fig. S4** Relative resistance of Ag/CNT lines on PET for various bending radii and strains in 10,000 cycles when sintered by microwaves at 70 °C for ~0.3 s. The inset shows the sample under test when the bending radius was 10 mm.

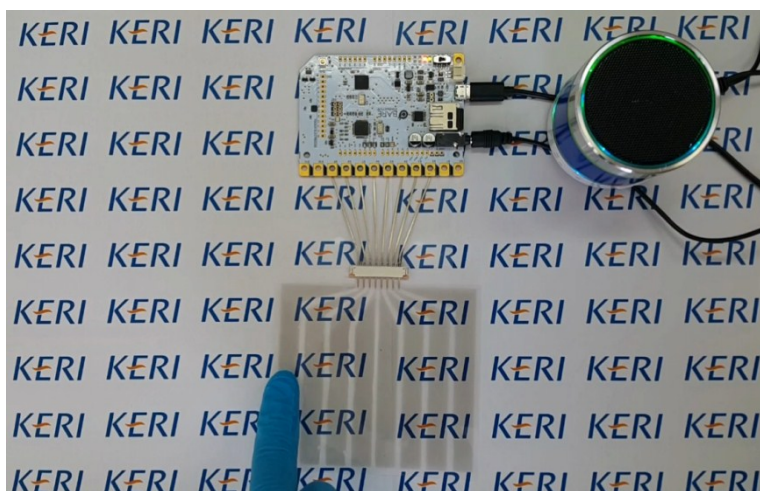

**Fig. S5** Flexible touch piano consisting of a CNT touch keyboard, Ag interconnects, an Arduino-based control board, and a speaker. Movie S1 shows that we were able to play a tune ('Twinkle Twinkle Little Star') on this touch piano.
